# Supplementary material
Source: PubMed Central journal article supplement (PMC5077184)
Supplement: 10.1074_M116.754069_jbc.M116.754069-1.pdf [file 10.1074_M116.754069_jbc.M116.754069-1.pdf]

# Supporting Information

## **The Polyadenosine RNA Binding Protein, Zinc Finger Cys<sub>3</sub>His Protein #14 (ZC3H14), Regulates the pre-mRNA Processing of a Key ATP Synthase Subunit mRNA**

Callie P. Wigington, Kevin J. Morris, Laura E. Newman, and Anita H. Corbett

Page S-1.....Figure S1

Page S-2.....Figure S2

\

## Supplemental Figure 1.

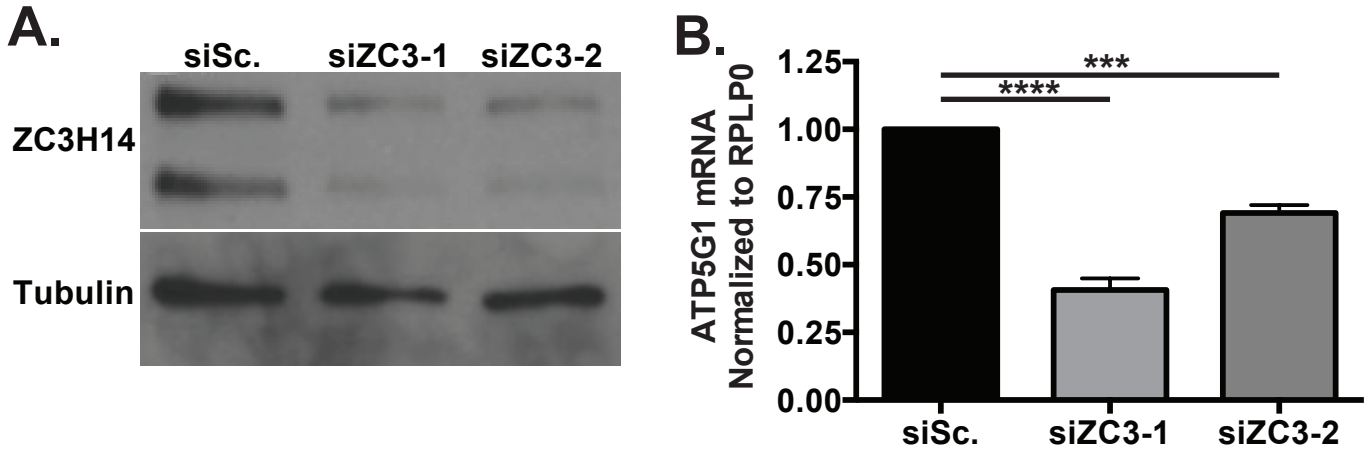

**Supplemental Figure 1: Knockdown of ZC3H14 with independent siRNAs results in decreased *ATP5G1* mRNA levels.** To confirm that the observed decrease in *ATP5G1* steady-state mRNA levels was specific to ZC3H14 knockdown, we performed siRNA-mediated knockdown of ZC3H14 with two independent siRNAs (siZC3-1 and siZC3-2) in MCF-7 cells. Transfected cells were subjected to immunoblot analysis (A) with ZC3H14 and Tubulin (control) antibodies and qRT-PCR analysis (B) with primers specific to *ATP5G1* and the control transcript, *RPLP0*. Values are set to 1.0 for siScramble and normalized to *RPLP0*. Values represent the mean  $\pm$  SEM for n=3. \*\*\* and \*\*\*\* represent  $p \leq 0.001$  and  $p \leq 0.0001$ , respectively.

## Supplemental Figure 2.

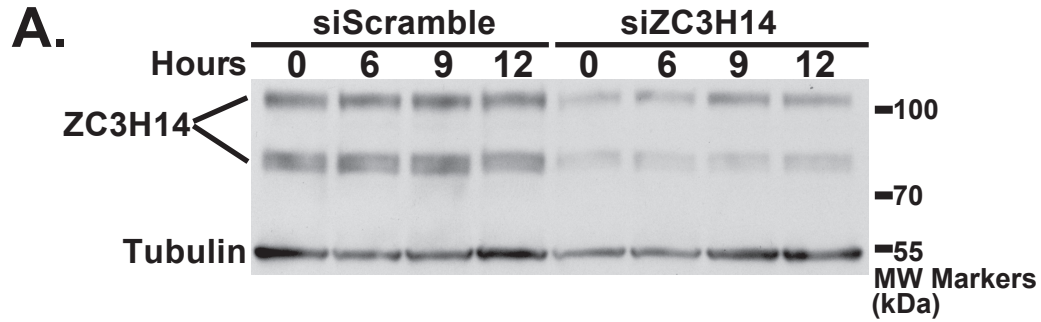

**Supplemental Figure 2: ZC3H14 modulates the stability of *ATP5G1* mRNA.** A) MCF-7 cells were treated with the transcriptional inhibitor, ActD, and collected at the indicated time points after drug addition. Immunoblot analysis of total protein isolated from these samples to detect ZC3H14 and Tubulin revealed a robust decrease in ZC3H14 protein levels that persists across the time course of the experiment.
